# Supplementary material
Source: publisher figshare collection journal article supplement (https://karger.figshare.com/ndownloader/files/15343970)
Supplement: Supplementary file 1 [file 15343970]

DETAILED SEARCHES

PUBMED (1098):

1.- (brain cancer[Title/Abstract] OR brain tumor[Title/Abstract] OR brain neoplasm[Title/Abstract] OR meningioma[Title/Abstract] OR glioma[Title/Abstract] OR primitive neuroectodermal tumo*[Title/Abstract] OR medulloblastoma[Title/Abstract] OR PNET[Title/Abstract] OR central nervous system tumo*[Title/Abstract]) (66671)

2.- (child*[Title/Abstract] OR adolescen*[Title/Abstract] OR young adult[Title/Abstract] OR infan*[Title/Abstract] OR pediatric[Title/Abstract] OR paediatric[Title/Abstract]) (1697167)

3.- (heavy metal[Title/Abstract] OR cadmium[Title/Abstract] OR lead[Title/Abstract] OR tap water[Title/Abstract] OR nitrate[Title/Abstract] OR nitrite[Title/Abstract] OR disinfection byproduct[Title/Abstract] OR meat[Title/Abstract] OR diet[Title/Abstract] OR pesticide[Title/Abstract] OR farm[Title/Abstract] OR parental occupation*[Title/Abstract] OR air pollution[Title/Abstract] OR toxic*[Title/Abstract] OR tobacco smoke[Title/Abstract] OR smoking cigarette[Title/Abstract] OR socioeconomic[Title/Abstract] OR income[Title/Abstract] OR poverty[Title/Abstract] OR pregnancy[Title/Abstract] OR cell phone[Title/Abstract] OR mobile[Title/Abstract]) (1946303)

4.- 1 AND 2 AND 3: ((((((heavy metal[Title/Abstract] OR cadmium[Title/Abstract] OR lead[Title/Abstract] OR tap water[Title/Abstract] OR nitrate[Title/Abstract] OR nitrite[Title/Abstract] OR disinfection byproduct[Title/Abstract] OR meat[Title/Abstract] OR diet[Title/Abstract] OR pesticide[Title/Abstract] OR farm[Title/Abstract] OR parental occupation*[Title/Abstract] OR air pollution[Title/Abstract] OR toxic*[Title/Abstract] OR tobacco smoke[Title/Abstract] OR smoking cigarette[Title/Abstract] OR socioeconomic[Title/Abstract] OR income[Title/Abstract] OR poverty[Title/Abstract] OR pregnancy[Title/Abstract] OR cell phone[Title/Abstract] OR mobile[Title/Abstract])))) AND (((child*[Title/Abstract] OR adolescen*[Title/Abstract] OR young adult[Title/Abstract] OR infan*[Title/Abstract] OR pediatric[Title/Abstract] OR paediatric[Title/Abstract])))) AND (((brain cancer[Title/Abstract] OR brain tumor[Title/Abstract] OR brain neoplasm[Title/Abstract] OR meningioma[Title/Abstract] OR glioma[Title/Abstract] OR primitive neuroectodermal tumo*[Title/Abstract] OR medulloblastoma[Title/Abstract] OR PNET[Title/Abstract] OR central nervous system tumo*[Title/Abstract]))) ) (1098)

Web of science (165):

[((TÍTULO: ((((((((brain cancer OR brain tumor) OR brain neoplasm) OR meningioma) OR glioma) OR primitive neuroectodermal tumo*) OR medulloblastoma) OR pent) OR central nervous system tumo*) AND TÍTULO: (((((child* OR adolescen*) OR young adult) OR infan*) OR pediatric) OR paediatric)) AND TÍTULO:(((((((((((((((((((((heavy metal OR cadmium) OR lead) OR tap water) OR nitrate) OR nitrite) OR disinfection byproduct) OR meat) OR diet) OR pesticide) OR farm) OR parental occupation*) OR air pollution) OR toxic*) OR tobacco smoke) OR smoking cigarette) OR socioeconomic) OR income) OR poverty) OR pregnancy) OR cell phone) OR mobile))](https://apps.webofknowledge.com/UseSpellSuggestion.do?action=takeSuggestion&product=UA&SID=D6paW4XbgKmbLWAcU2h&search_mode=GeneralSearch&update_back2search_link_param=yes&viewType=summary&qid=6)

Cochrane (5):

(child* OR adolescen* OR young adult OR infan* OR pediatric OR paediatric) in Title Abstract Keyword AND (heavy metal OR cadmium OR lead OR tap water OR nitrate OR nitrite OR disinfection byproduct OR meat OR diet OR pesticide OR farm OR parental occupation* OR air pollution OR toxic* OR tobacco smoke OR smoking cigarette OR socioeconomic OR income OR poverty OR pregnancy OR cell phone OR mobile ) in Title Abstract Keyword AND (brain cancer OR brain tumor OR brain neoplasm OR meningioma OR glioma OR primitive neuroectodermal tumo* OR medulloblastoma OR PNET OR central nervous system tumo*) in Title Abstract Keyword)

Google scholar (35):

allintitle: (child OR adolescent OR "young adult" OR infant OR pediatric OR paediatric) AND ("heavy metal" OR cadmium OR lead OR "tap water" OR nitrate OR nitrite OR "disinfection by product" OR meat OR diet OR pesticide OR farm OR "parental occupation" OR "air pollution” OR toxic* OR tobacco smoke OR smoking cigarette OR socioeconomic OR income OR poverty OR pregnancy OR cell phone OR mobile ) AND (brain cancer OR brain tumor OR brain neoplasm OR meningioma OR glioma OR primitive neuroectodermal tumo* OR medulloblastoma OR PNET OR central nervous system tumo*)

Scopus (1.723):

( TITLE-ABS-KEY ( child  OR  childhood  OR  adolescent  OR  adolescence  OR  "young adult"  OR  infant  OR  infancy  OR  pediatric  OR  paediatric )  AND  TITLE-ABS-KEY ( "heavy metal"  OR  cadmium  OR  lead  OR  "tap water"  OR  nitrate  OR  nitrite  OR  "disinfection byproduct"  OR  meat  OR  diet  OR  pesticide  OR  farm  OR  "parental occupation"  OR  "air pollution"  OR  toxicant  OR  "tobacco smoke"  OR  smoking  OR  socioeconomic )  AND  TITLE-ABS-KEY ( "brain cancer"  OR  "brain tumour"  OR  "brain tumor"  OR  "brain neoplasm"  OR  meningioma  OR  glioma  OR  "primitive neuroectodermal tumor"  OR  medulloblastoma  OR  pnet  OR  "central nervous system tumor" ) )

IME- Biomedicina (0):

[Por Campos] [Título documento(Alguna palabra)="niño, adolescencia, adolescente, joven, infantil, pediátrico" Y Título documento(Alguna palabra)=" "metal pesado", cadmio, plomo, "agua del grifo", nitrato, nitrito, "subproducto de desinfección", carne, dieta, pesticida, granja, "ocupación parental", "contaminación del aire", tóxico, "humo de tabaco", fumar, socioeconómico" Y Título documento(Alguna palabra)=" "cáncer de cerebro", "tumor cerebral", "neoplasia cerebral", meningioma, glioma, "tumor neuroectodermico primitivo", meduloblastoma, pnet, "tumor del sistema nervioso central" "](https://indices.app.csic.es/bddoc-internet/pages/mtodocumentos/ConsultaDocumentos.html?faces-redirect=true&bsqCamposPort=true)
